# Supplementary material for: Plant array chip for the germination and growth screening of Arabidopsis thaliana
Source: Royal Society of Chemistry journal article supplement (doi:10.1039/c7lc00463j), 2017-01-01
Supplement: c7lc00463j1.pdf [file c7lc00463j1.pdf]

Electronic Supplementary Information (ESI)

**Plant array chip for the germination and growth screening of  
*Arabidopsis thaliana***

Youn-Hee Park,<sup>a</sup> Nayoung Lee,<sup>b</sup> Giltsu Choi<sup>b,\*</sup> and Je-Kyun Park<sup>a,\*</sup>

<sup>a</sup> *Department of Bio and Brain Engineering, Korea Advanced Institute of Science and Technology (KAIST), 291 Daehak-ro, Yuseong-gu, Daejeon 34141, Republic of Korea. E-mail: jekyun@kaist.ac.kr; Fax: +82 42 350 4310; Tel: +82 42 350 4315.*

<sup>b</sup> *Department of Biological Sciences, Korea Advanced Institute of Science and Technology (KAIST), 291 Daehak-ro, Yuseong-gu, Daejeon 34141, Republic of Korea. E-mail: gchoi@kaist.ac.kr; Fax: +82 42 350 2610; Tel: +82 42 350 2636.*

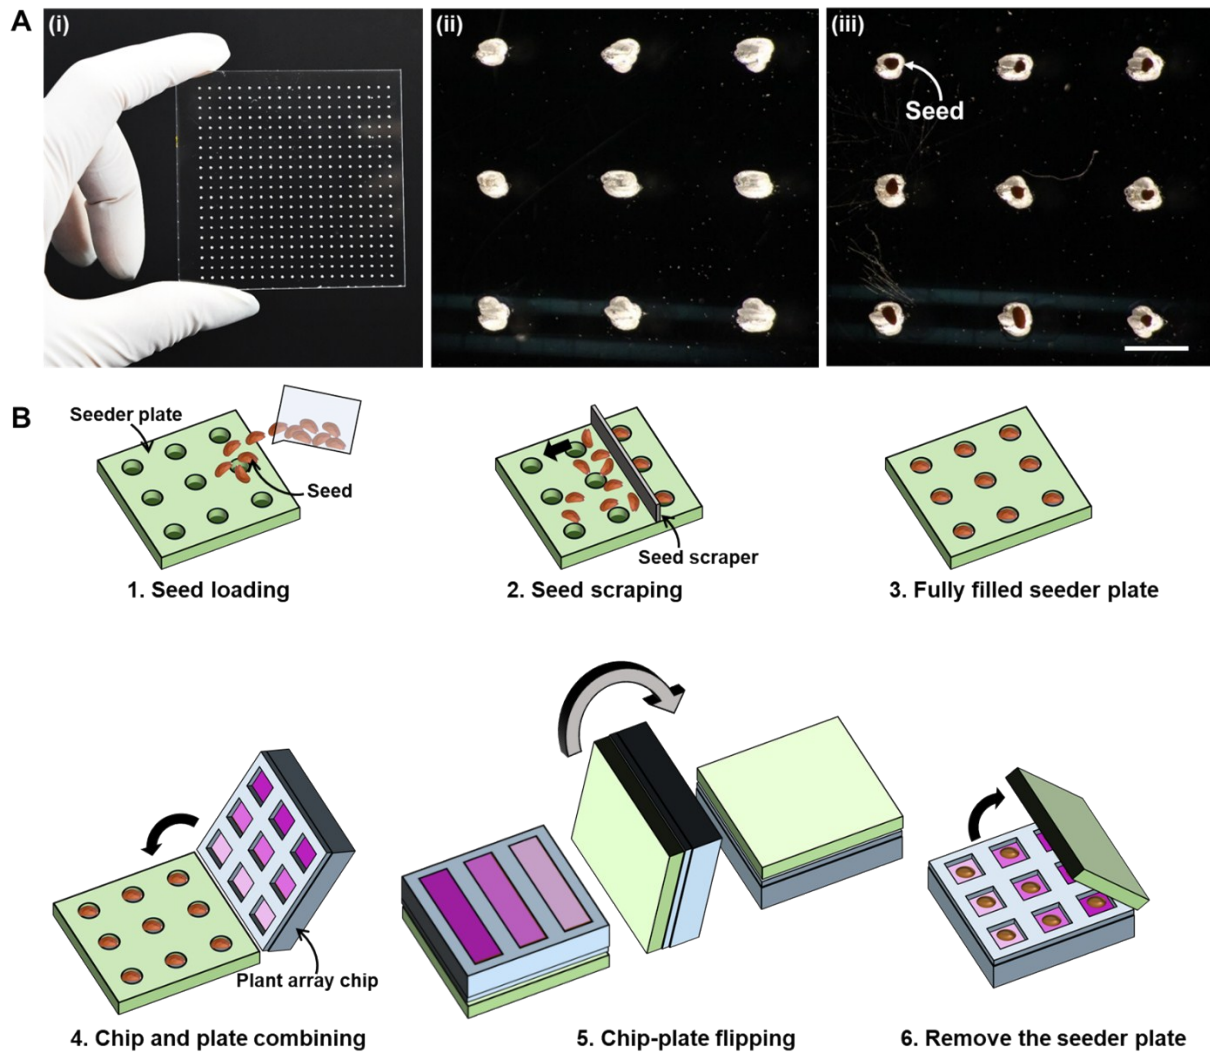

**Figure S1.** (A) Photograph of seeder plate. (i) The seeder plate made of transparent acrylic PMMA. Magnified dark field stereoscopic image of (ii) the empty and (iii) seed-filled seeder plate. Scale bar is 2 mm. (B) Illustration of the seeding process with a homemade seeder plate.
